# Supplementary material for: Carbon-supported metal nanodendrites as efficient, stable catalysts for the oxygen reduction reaction
Source: Royal Society of Chemistry journal article supplement (doi:10.1039/c7ta08964c), 2018-01-01
Supplement: c7ta08964c1.pdf [file c7ta08964c1.pdf]

**Supporting Information for:**

**Carbon-supported metal nanodendrites as efficient, stable catalysts for the oxygen reduction reaction**

*Luna B. Venarusso<sup>1</sup>, Chirley V. Boone<sup>1</sup>, Jefferson Bettini<sup>2</sup>, Gilberto Maia<sup>1\*</sup>*

<sup>1</sup>Institute of Chemistry, Universidade Federal de Mato Grosso do Sul; Av. Senador Filinto Muller, 1555; Campo Grande, MS 79074-460, Brazil.

<sup>2</sup>Brazilian Nanotechnology National Laboratory (LNNano); Rua Giuseppe Máximo Scolfaro, 10000; Campinas, SP 13083-100, Brazil.

\*To whom correspondence should be addressed.

Table S1. Initial and EDX metal masses, TG metal masses (unburned), and TG and EDX mass percentages of MND/C nanocomposites.

|             | Initial<br>mass<br>(mg)                         | Initial<br>mass (%)                                   | EDX metal<br>mass (%)            | TG metal<br>mass,<br>unburned (%) | TG and<br>EDX<br>masses<br>(%)             |
|-------------|-------------------------------------------------|-------------------------------------------------------|----------------------------------|-----------------------------------|--------------------------------------------|
| Pt/C        | C: 16<br>Pt: 4                                  | C: 80<br>Pt: 20                                       | Pt: 100                          | 19.2                              | C: 80.8<br>Pt: 19.2                        |
| Pt'/C       | C: 16<br>Pt: 4<br>Ni: 0.8                       | C: 76.9<br>Pt: 19.2<br>Ni: 3.9                        | Pt: 100                          | 18.7                              | C: 81.3<br>Pt: 18.7                        |
| Pt-Pd/C     | C: 16<br>Pt: 4<br>Pd: 1.4                       | C: 74.8<br>Pt: 18.7<br>Pd: 6.5                        | Pt: 68.4<br>Pd: 31.6             | 25.8                              | C: 74.1<br>Pt: 17.7<br>Pd: 8.2             |
| Pt@Au/C     | C: 16<br>Pt: 4<br>Au: 2.6                       | C: 70.8<br>Pt: 17.7<br>Au: 11.5                       | Pt: 62.1<br>Au: 37.9             | 32.9                              | C: 67.1<br>Pt: 20.4<br>Au: 12.5            |
| Pt-Pd'/C    | C: 16<br>Pt: 4<br>Pd: 1.4<br>Ni: 0.8            | C: 72.1<br>Pt: 18.0<br>Pd: 6.3<br>Ni: 3.6             | Pt: 68.6<br>Pd: 31.4             | 26.6                              | C: 73.4<br>Pt: 18.2<br>Pd: 8.4             |
| Pt-Pd@Au/C  | C: 16<br>Pt: 4<br>Pd: 1.4<br>Au: 2.6            | C: 66.7<br>Pt: 16.7<br>Pd: 5.8<br>Au: 10.8            | Pt: 47.8<br>Pd: 21.6<br>Au: 30.6 | 34.7                              | C: 65.3<br>Pt: 16.6<br>Pd: 7.5<br>Au: 10.6 |
| Pt@Au'/C    | C: 16<br>Pt: 4<br>Au: 2.6<br>Ni: 0.8            | C: 68.4<br>Pt: 17.1<br>Au: 11.1<br>Ni: 3.4            | Pt: 57.9<br>Au: 42.1             | 29.4                              | C: 70.6<br>Pt: 17.0<br>Au: 12.4            |
| Pt-Pd@Au'/C | C: 16<br>Pt: 4<br>Pd: 1.4<br>Au: 2.6<br>Ni: 0.8 | C: 64.5<br>Pt: 16.1<br>Pd: 5.7<br>Au: 10.5<br>Ni: 3.2 | Pt: 46.2<br>Pd: 25.5<br>Au: 28.3 | 31.0                              | C: 69.0<br>Pt: 14.3<br>Pd: 7.9<br>Au: 8.8  |

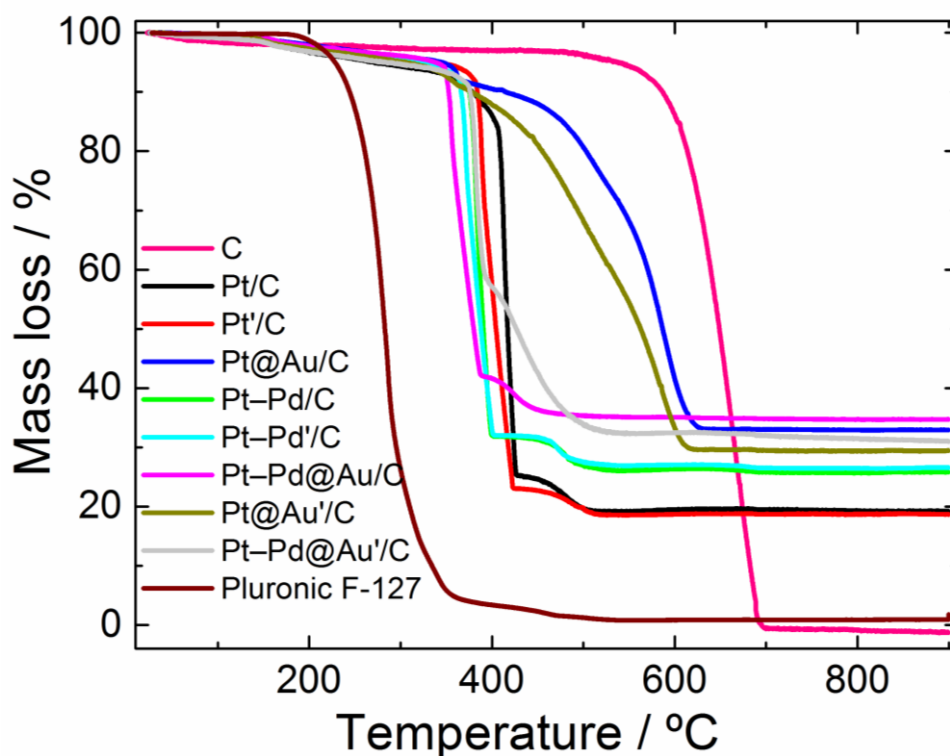

Fig. S1. TG responses for Vulcan Carbon XC-72 (C), Pluronic F-127, and MND/C (burning).

### S1. Electrochemical profile

Figure S2 shows cyclic voltammograms for bare CG and GC electrodes modified with Vulcan Carbon XC-72, Pt(10 wt.%) on carbon, and E-Tek Pt/C (20% Pt mass), recorded in  $N_2$ -saturated 0.1 M  $HClO_4$ . For bare GC, no faradaic responses were detected within the 0.05-1.2 V potential region. When the GC electrode is modified with Vulcan Carbon XC-72 or Pt(10 wt.%) on carbon, the region of electrical double layer, formed at an electrolyte–electrode interface, behaves approximately as an ideal electrical capacitor [1, 2], storing charge when voltage is applied and, therefore, exhibiting higher capacitive currents. Pt electrochemical features were virtually absent from GC modified with Pt(10 wt.%) on carbon (Figure S3). For the GC electrode modified with E-Tek Pt/C (20% Pt mass), however, CV behavior is very similar to that observed for GC modified with MND/Cs (Figure 5).

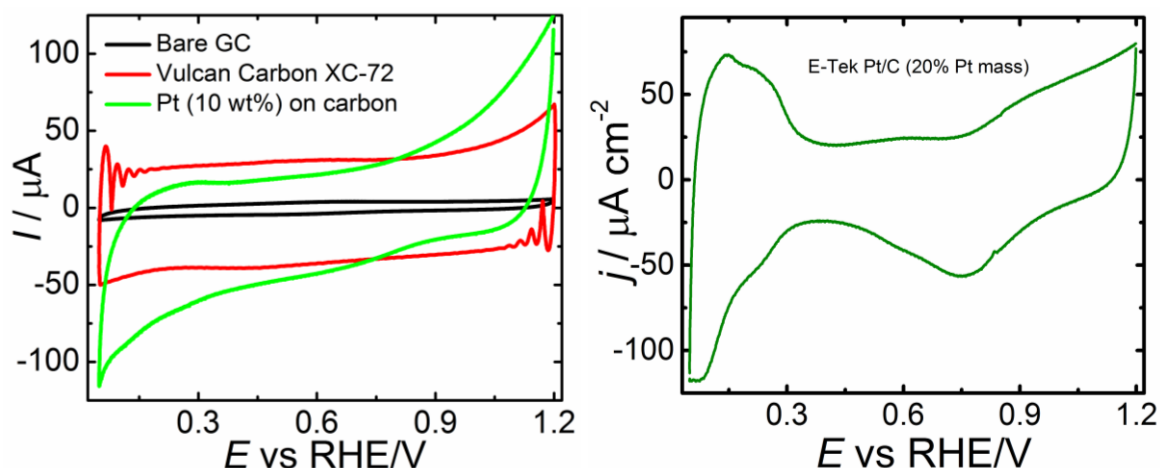

Fig. S2. Cyclic voltammograms for bare CG and GC electrodes modified with Vulcan Carbon XC-72, Pt(10 wt.%) on carbon, and E-Tek Pt/C (20% Pt mass), recorded in  $\text{N}_2$ -saturated 0.1 M  $\text{HClO}_4$ . Scan rate:  $50 \text{ mV s}^{-1}$ . Scans started at 1.2 V.

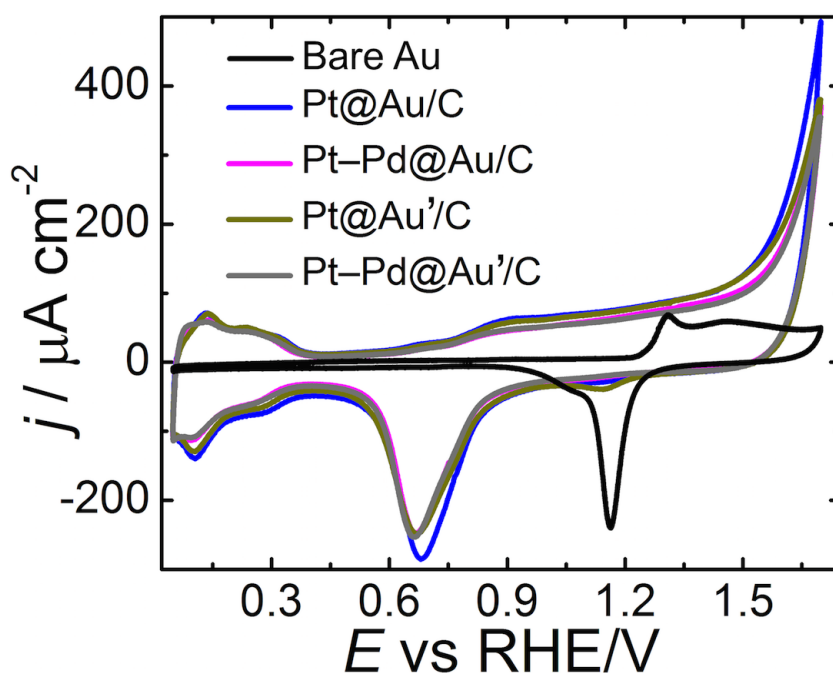

Fig. S3. Cyclic voltammograms for bare Au and GC electrodes modified with MND/Cs, recorded in  $\text{N}_2$ -saturated 0.1 M  $\text{HClO}_4$ . Scan rate:  $50 \text{ mV s}^{-1}$ . Scans started at 0.05 V. The graph depicts final CVs, recorded after all electrochemical experiments were performed. CVs are normalized to the electrochemically active surface area (ECSA).

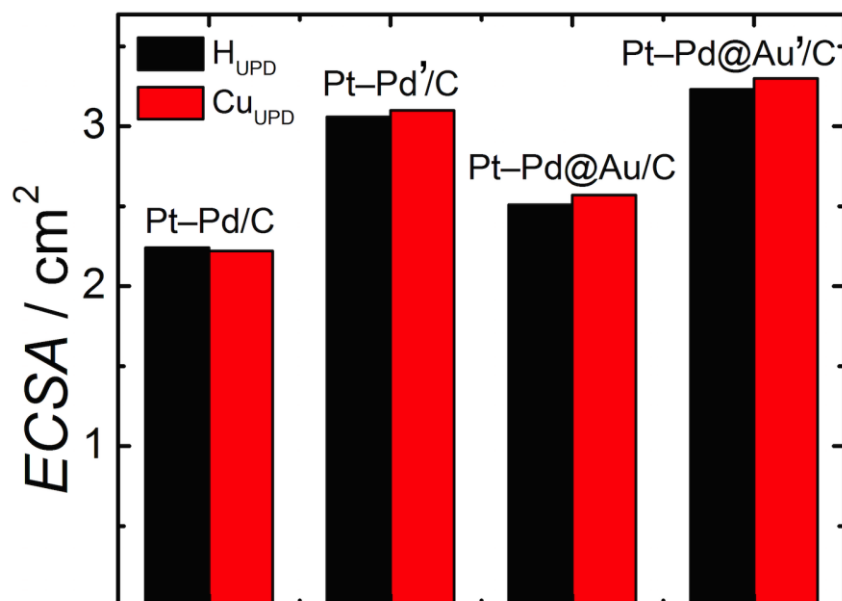

Fig. S4. Comparison of  $ECSA$  values calculated from  $\text{H}_{\text{UPD}}$ - and  $\text{Cu}_{\text{UPD}}$ -stripping for GC electrodes modified with Pt-Pd/C, Pt-Pd'/C, Pt-Pd@Au/C, and Pt-Pd@Au'/C nanocomposites.

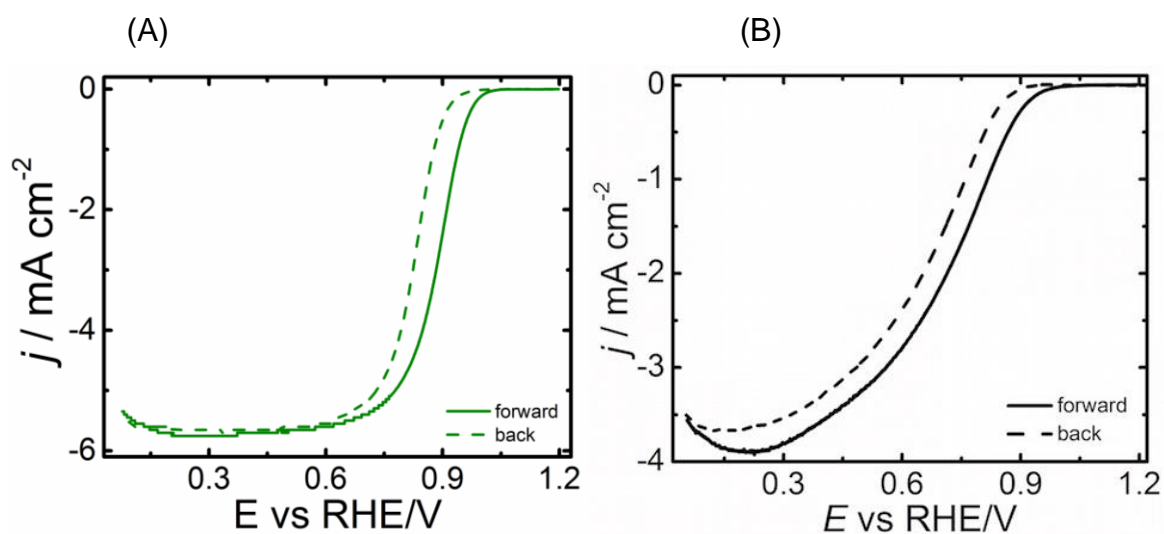

Fig. S5. Hydrodynamic cyclic voltammogram for (A) a modified E-Tek Pt/C (20% Pt mass)/GC electrode and (B) a Pt(10 wt.%) on carbon/GC electrode in  $\text{O}_2$ -saturated 0.1 M  $\text{HClO}_4$  at  $v = 10 \text{ mV s}^{-1}$  and 1600 rpm.

Specific activity (SA, in mA cm<sup>-2</sup>) [3, 4] was calculated as follows:

$$SA = \frac{\frac{I \times I_d}{I_d - I}}{ECSA} = \frac{I_K}{ECSA} \quad (S1)$$

where  $I$  is the measured current and  $I_d$  and  $I_k$  are the diffusion-limited and kinetic currents, respectively.

MSA (mA μg<sup>-1</sup>) was determined from the  $I_k$  value divided by  $A_g$  (the geometric GC surface area, cm<sup>2</sup>) and by  $L_{PGM}$  (the Pt-group metal loading of the working electrode, mg cm<sup>-2</sup>) [3, 4]:

$$MSA = \frac{I_k}{L_{PGM} A_g} \quad (S2)$$

Specific ECSA calculation was based on the following relation [3-6]:

$$Specific\ ECSA = \frac{ECSA}{L_{PGM} A_g} \quad (S3)$$

**Table S2.**  $E_{1/2}$ , PGM loading ( $L_{\text{PGM}}$ ),  $MSA$ , specific  $ECSA$ ,  $SA$ , and  $ECSA$  values from the present study and retrieved literature.

|                                                                                | $E_{1/2}$<br>(V) | $L_{\text{PGM}}$<br>( $\mu\text{g}_{\text{PGM}}$<br>$\text{cm}^{-2}$ ) | $MSA$ at<br>$0.90 V_{\text{IR-free}}$<br>( $\text{mA } \mu\text{g}^{-1}$ ) | Specific<br>$ECSA$ ( $\text{m}^2$<br>$\text{g}^{-1}$ ) | $SA$ at<br>$0.90 V_{\text{IR-free}}$<br>( $\text{mA cm}^{-2}$ ) | $ECSA$<br>( $\text{cm}^2$ ) | Ref.          |
|--------------------------------------------------------------------------------|------------------|------------------------------------------------------------------------|----------------------------------------------------------------------------|--------------------------------------------------------|-----------------------------------------------------------------|-----------------------------|---------------|
| Pt/C                                                                           | 0.92             | 29                                                                     | 0.53                                                                       | 46                                                     | 1.16                                                            | 2.6                         | Present study |
| Pt/C after 10 000 cycles                                                       | 0.92             | 29                                                                     | 0.53                                                                       | 45                                                     | 1.19                                                            | 2.6                         | Present study |
| Pt'/C                                                                          | 0.92             | 28                                                                     | 0.43                                                                       | 45                                                     | 0.94                                                            | 2.5                         | Present study |
| Pt-Pd/C                                                                        | 0.92             | 39                                                                     | 0.34                                                                       | 29                                                     | 1.17                                                            | 2.2                         | Present study |
| Pt@Au/C                                                                        | 0.92             | 31                                                                     | 0.33                                                                       | 36                                                     | 0.91                                                            | 2.2                         | Present study |
| Pt-Pd'/C                                                                       | 0.91             | 41                                                                     | 0.29                                                                       | 38                                                     | 0.76                                                            | 3.1                         | Present study |
| Pt-Pd@Au/C                                                                     | 0.91             | 37                                                                     | 0.21                                                                       | 35                                                     | 0.61                                                            | 2.5                         | Present study |
| Pt@Au'/C                                                                       | 0.93             | 26                                                                     | 0.56                                                                       | 65                                                     | 0.86                                                            | 3.3                         | Present study |
| Pt@Au'/C after 10 000 cycles                                                   | 0.92             | 26                                                                     | 0.53                                                                       | 39                                                     | 1.35                                                            | 2.0                         | Present study |
| Pt-Pd@Au'/C                                                                    | 0.92             | 34                                                                     | 0.33                                                                       | 48                                                     | 0.69                                                            | 3.2                         | Present study |
| Pt-Pd@Au'/C after 10 000 cycles                                                | 0.91             | 34                                                                     | 0.32                                                                       | 39                                                     | 0.82                                                            | 2.6                         | Present study |
| E-Tek Pt/C (20% Pt mass)                                                       | 0.89             | 31                                                                     | 0.13                                                                       | 46                                                     | 0.29                                                            | 2.8                         | Present study |
| Octahedral PtNiCo/C                                                            | -                | 7.65                                                                   | 2.33                                                                       | 61.6                                                   | 3.88                                                            | -                           | 7             |
| Carbon-supported PtNiCo alloy nanohexapod catalyst (PNCH/C)                    | -                | 10                                                                     | 0.8                                                                        | -                                                      | 1.6                                                             | -                           | 8             |
| Dendritic PtCuNi cubes (PtCuNi/C)                                              | 0.921            | 10                                                                     | 0.63 at 0.92 V                                                             | 63.8                                                   | 0.97 at 0.92 V                                                  | -                           | 9             |
| Pd <sub>1</sub> Pt <sub>5</sub> dendrites (Pd <sub>1</sub> Pt <sub>5</sub> /C) | 0.88             | 16 of Pt                                                               | 0.192                                                                      | 61.06                                                  | 0.314                                                           | -                           | 10            |
| Pt-based icosahedral nanocages                                                 | -                | 11.2 of Pt                                                             | 1.28                                                                       | 36.5                                                   | 3.5                                                             | -                           | 11            |
| Pd@Pt <sub>2.7</sub> /C                                                        | -                | 30.6                                                                   | 0.64                                                                       | 47.1                                                   | 1.36                                                            | -                           | 12            |
| Pd@Pt-Ni/C with octahedral core-shell nanocrystals                             | -                | 12.3 of Pt                                                             | 0.48                                                                       | 178.01                                                 | 0.45                                                            | 4.29                        | 13            |

|                                                                                                |       |       |                   |      |                  |     |    |
|------------------------------------------------------------------------------------------------|-------|-------|-------------------|------|------------------|-----|----|
| PdPt/C alloy,<br>Pd@Pt/C<br>core-shell                                                         | 0.884 | 62.11 | 0.216             | 46.7 | 0.215            | -   | 14 |
| Pd <sub>3</sub> Au@Pt/C                                                                        | -     | 10.1  | 0.25              | -    | -                | -   | 15 |
| Rhombic<br>dodecahedral<br>AuPt@Pt<br>bimetallic<br>nanocrystals<br>with dendritic<br>branches | -     | 30    | 0.24              | 43   | 0.55             | -   | 16 |
| Pt-Pd-<br>Cu/GNRs<br>(graphene<br>nanoribbons)                                                 | 0.95  | 46    | 0.70 at 0.93<br>V | 54   | 1.3 at<br>0.93 V | 4.9 | 17 |
| Porous<br>nanostars of<br>Pt-Pd@Au'                                                            | 0.95  | 88.4  | 0.46              | 37   | 1.24             | 6.5 | 18 |
| Pt@Au<br>nanocrystals                                                                          | 0.93  | 50.4  | 0.41              | 34   | 1.22             | 3.3 | 19 |

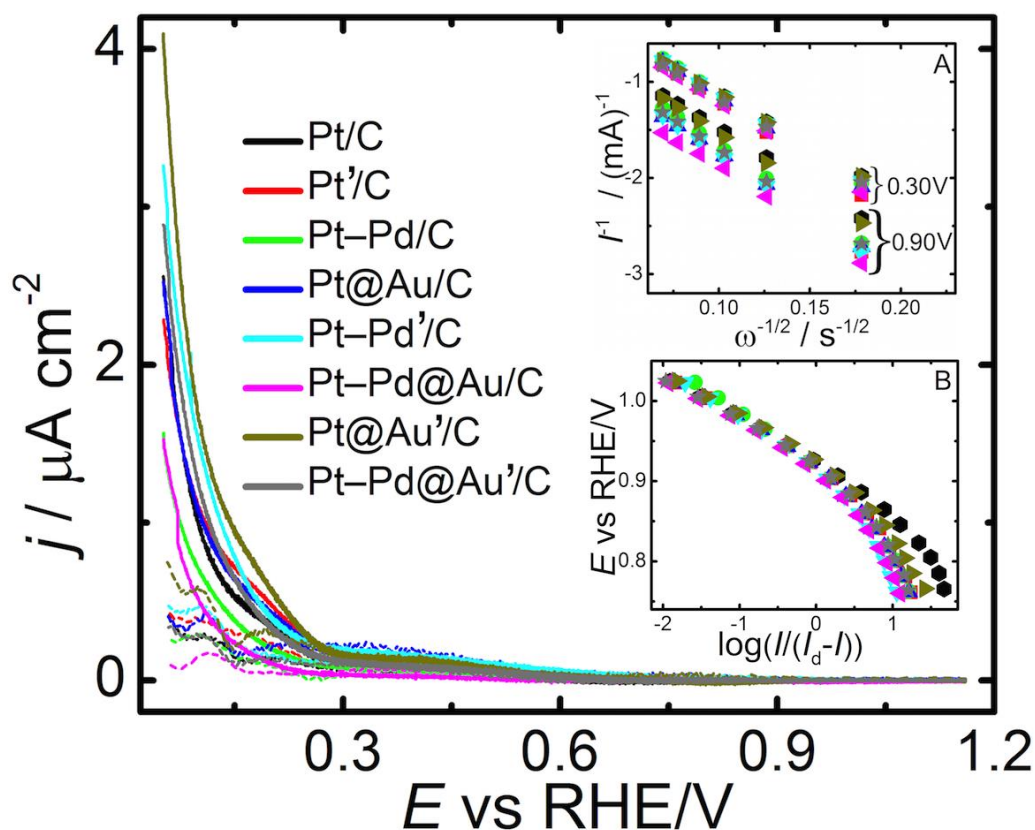

Fig. S6. Current density responses calculated per geometric area for a bare Au ring electrode maintained at 1.2 V, coupled with disk HCV for GC electrodes modified with MND/C nanocomposites in O<sub>2</sub>-saturated 0.1 M HClO<sub>4</sub>.  $\omega = 1600$  rpm; scan rate: 10 mV s<sup>-1</sup>. Scans started at 0.05 V. Inset: (A) Koutecký-Levich plots obtained from forward hydrodynamic linear potential scan curves for GC electrodes modified with MND/C nanocomposites, in O<sub>2</sub>-saturated 0.1 M HClO<sub>4</sub> (same curves as in Figure S8). (B) Tafel plots obtained from data in Figure S8 ( $\omega = 1600$  rpm).



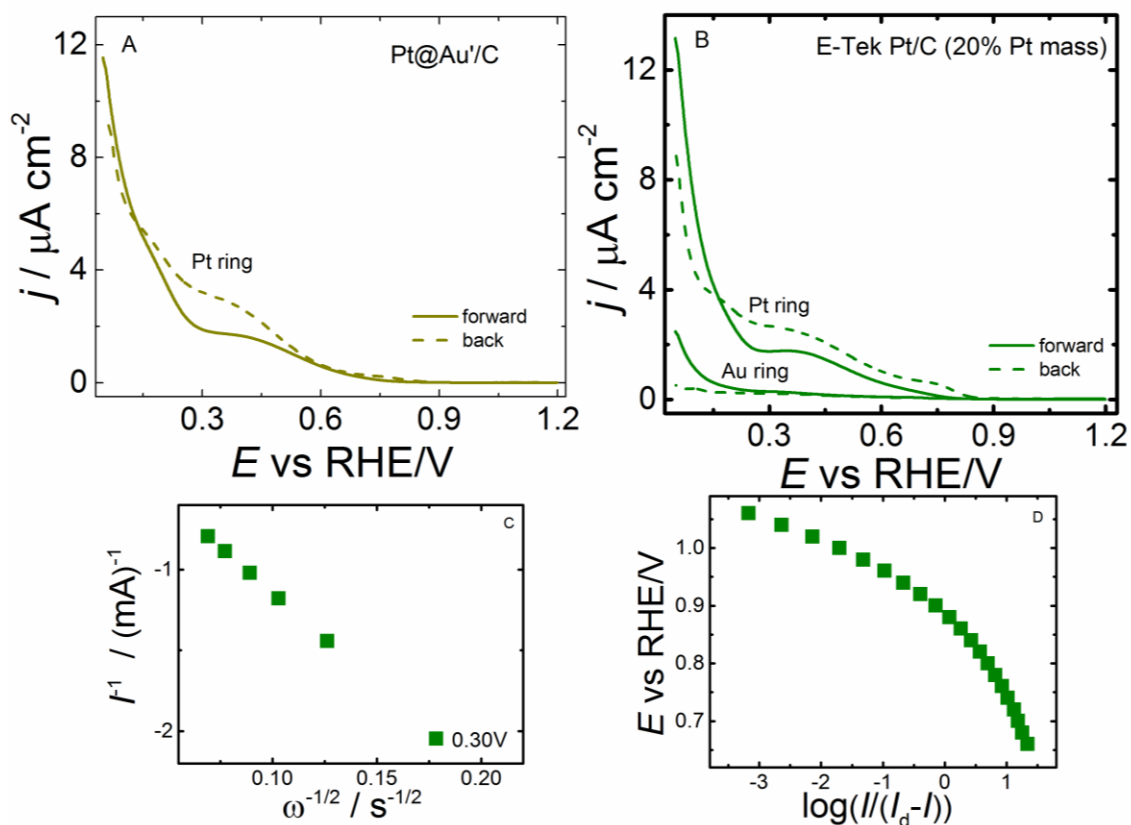

Fig. S7. Current density responses calculated per geometric area for a bare Pt (or Au) ring electrode maintained at 1.2 V, coupled with disk HCV for GC electrodes modified with (A) Pt@Au/C and (B) E-Tek Pt/C (20% Pt mass) in  $\text{O}_2$ -saturated 0.1 M  $\text{HClO}_4$ .  $\omega = 1600 \text{ rpm}$ ; scan rate:  $10 \text{ mV s}^{-1}$ . Scans started at 0.05 V. (C) Koutecký–Levich plot obtained from forward hydrodynamic linear potential scan curves for a GC electrode modified with E-Tek Pt/C (20% Pt mass), in  $\text{O}_2$ -saturated 0.1 M  $\text{HClO}_4$  (data not shown). (B) Tafel plots obtained from data in Figure S5A.

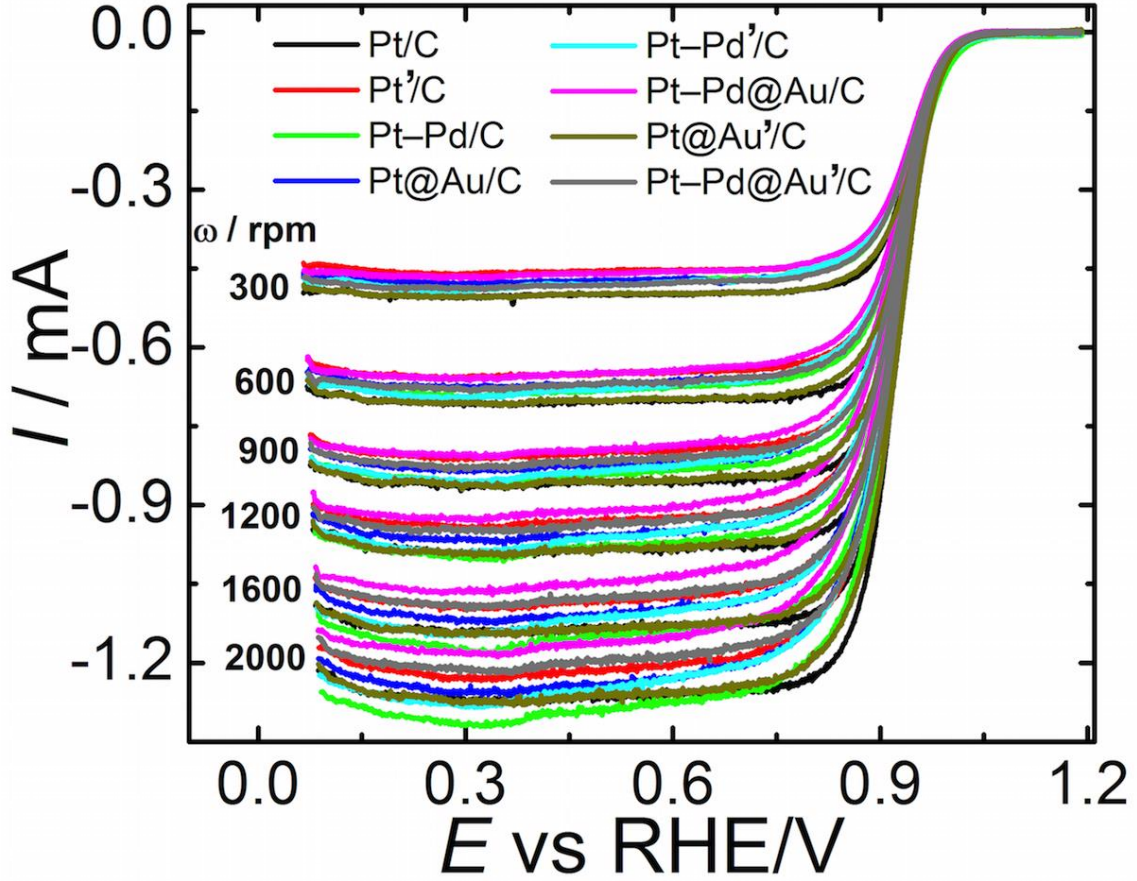

Fig. S8. Hydrodynamic voltammograms for modified GC electrodes in O<sub>2</sub>-saturated 0.1 M HClO<sub>4</sub>. Scan rate: 10 mV s<sup>-1</sup>. Scans started at 0.05 V.

The percentage of H<sub>2</sub>O<sub>2</sub> formation,  $X_{H_2O_2}$ , can be calculated from the molar flux rates of O<sub>2</sub>,  $\dot{n}_{O_2(4e^-)}$ , and H<sub>2</sub>O<sub>2</sub>,  $\dot{n}_{O_2(2e^-)}$ , according to Eqs. S3 and S4 [3, 20]:

$$\dot{n}_{O_2(4e^-)} = \frac{I_{H_2O}}{4F} \quad \text{and} \quad \dot{n}_{O_2(2e^-)} = \frac{I_{H_2O_2}}{2F} \quad (S4)$$

$$X_{H_2O_2} = \frac{\dot{n}_{O_2(2e^-)}}{\dot{n}_{O_2(2e^-)} + \dot{n}_{O_2(4e^-)}} = \frac{\frac{2I_R}{N}}{I_D + \frac{I_R}{N}} \quad (S5)$$

where  $I_{H_2O} = I_D - I_{H_2O_2}$ ,  $I_{H_2O_2} = I_R N^{-1}$ , and  $N = -\frac{I_R}{I_D}$ , such that  $I_{H_2O}$  and  $I_{H_2O_2}$  are the currents for O<sub>2</sub> reduction to water and H<sub>2</sub>O<sub>2</sub>, respectively;  $F$  is the Faraday constant (96 485 C mol<sup>-1</sup>);  $I_R$  and  $I_D$  are the ring and disk currents, respectively; and  $N$  is the collection efficiency (0.26). H<sub>2</sub>O<sub>2</sub> synthesis declined to negligible levels above 0.30 V (Figure S6).

Koutecký–Levich plots (Figure S6B) were obtained using Eq. S6 [21]:

$$\frac{1}{I} = \frac{1}{I_k} + \frac{1}{I_d} = \frac{1}{nF(ECSA)k C_{O_2}^b} - \frac{1}{0.62nFAD_{O_2}^{\frac{2}{3}} \nu^{-\frac{1}{6}} C_{O_2}^b \omega^{\frac{1}{2}}} \quad (S6)$$

where  $n$  is the number of electrons transferred per  $O_2$  molecule,  $ECSA$  is the electrochemically active surface area,  $A$  is the electrode geometric area,  $k$  is the rate constant for  $O_2$  reduction,  $C_{O_2}^b$  is the oxygen concentration in the solution ( $1.2 \times 10^{-6}$  mol  $cm^{-3}$ ) [22, 23],  $D_{O_2}$  is the oxygen diffusion coefficient in the medium ( $1.9 \times 10^{-5}$   $cm^2$   $s^{-1}$ ) [22, 23],  $\nu$  is the kinematic viscosity of the solution ( $0.01$   $cm^2$   $s^{-1}$ ) [24], and  $\omega$  is the rotation rate.

Table S3. Values of  $n$  for modified GC electrodes, calculated from ORR, based on slopes of Koutecký–Levich plots (Figure S6A) obtained at 0.30 V and 0.90 V on the second term on the right-hand side of Equation S6, and Tafel slopes (Figure S6B) from ORR for GC electrodes modified with MND/C electrocatalysts.

| GC electrodes modified with MND/C electrocatalysts | $n$ (0.30 V) | $n$ (0.90 V) | Tafel slopes*            |                           |
|----------------------------------------------------|--------------|--------------|--------------------------|---------------------------|
|                                                    |              |              | Low $I$ (mV $dec^{-1}$ ) | High $I$ (mV $dec^{-1}$ ) |
| Pt/C                                               | 4.0          | 4.0          | −60                      | −116                      |
| Pt'/C                                              | 4.0          | 4.0          | −61                      | −123                      |
| Pt–Pd/C                                            | 4.0          | 4.0          | −64                      | −125                      |
| Pt@Au/C                                            | 4.0          | 4.0          | −61                      | −122                      |
| Pt–Pd'/C                                           | 4.0          | 4.0          | −59                      | −124                      |
| Pt–Pd@Au/C                                         | 4.0          | 4.0          | −62                      | −120                      |
| Pt@Au'/C                                           | 4.0          | 4.0          | −61                      | −118                      |
| Pt–Pd@Au'/C                                        | 4.0          | 4.0          | −59                      | −124                      |
| E-Tek Pt/C (20% Pt mass)                           | 4.0          | –            | −62                      | −121                      |

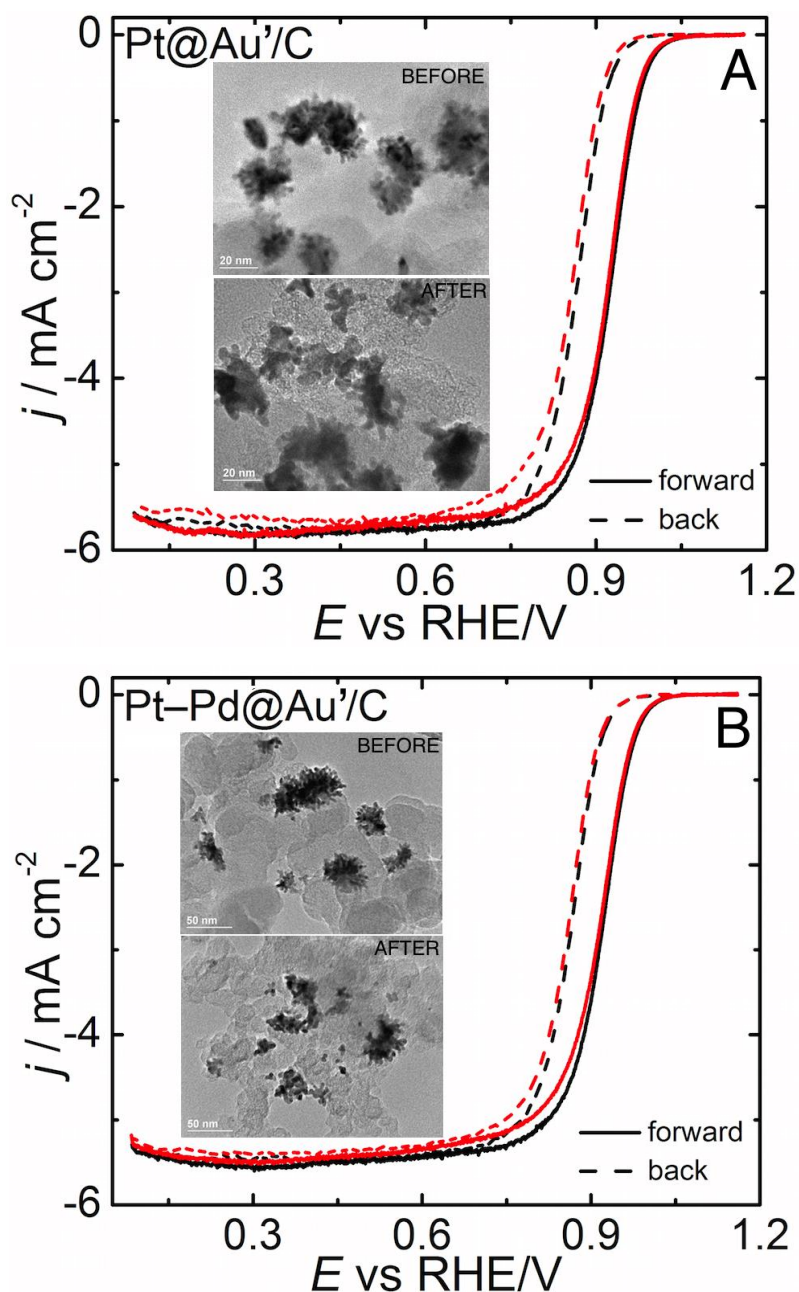

Fig. S9. Hydrodynamic cyclic voltammograms for GC electrodes modified with (A) Pt@Au'/C and (B) Pt-Pd@Au'/C electrocatalysts before and after the stability test (10 000 cycles between 0.6 and 1.0 V at 50 mV s<sup>-1</sup>), in O<sub>2</sub>-saturated 0.1 M HClO<sub>4</sub>.  $\omega$  = 1600 rpm; scan rate: 10 mV s<sup>-1</sup>. Scans started at 0.05 V. Inset: Representative TEM images for Pt@Au'/C and Pt-Pd@Au'/C electrocatalysts before and after 10 000 potential scans.

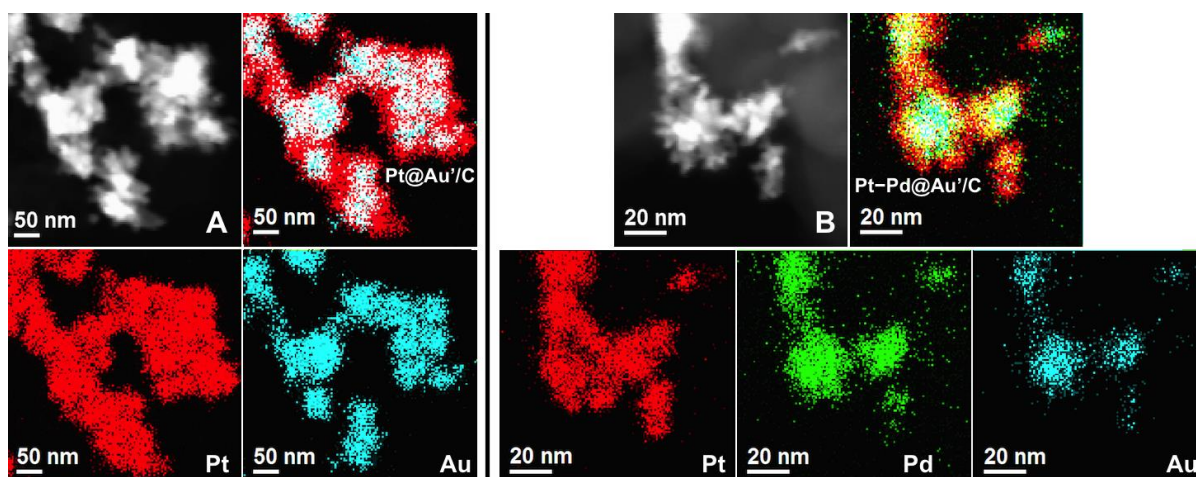

Fig. S10. Representative EDX mapping images for MND/Cs after 10 000 potential scans. (A) Pt@Au'/C; (B) Pt-Pd@Au'/C.

## References

- [1] B. E. Conway, *Electrochemical Supercapacitors - Scientific Fundamentals and Technological Applications*, Kluwer Academic / Plenum Publisher, New York, 1999.
- [2] J. R. Miller, R. A. Outlaw and B. C. Holloway, *Science*, 2010, **329**, 1637.
- [3] L. B. Venarussio, R. H. Sato, P. A. Fiorito and G. Maia, *J. Phys. Chem. C*, 2013, **117**, 7540.
- [4] G. V. Fortunato, L. B. Venarussio and G. Maia, *ChemElectroChem*, 2014, **1**, 625.
- [5] Y. Garsany, O. A. Baturina, K. E. Swider-Lyons and S. S. Kocha, *Anal. Chem.*, 2010, **82**, 6321.
- [6] B. Lim, M. Jiang, P. H. C. Camargo, E. C. Cho, J. Tao, X. Lu, Y. Zhu and Y. Xia, *Science*, 2009, **324**, 1302.
- [7] X. Huang, Z. Zhao, Y. Chen, E. Zhu, M. Li, X. Duan and Y. Huang, *Energy Environ. Sci.*, 2014, **7**, 2957.
- [8] A. Oh, Y. Jin Sa, H. Hwang, H. Baik, J. Kim, B. Kim, S. H. Joo and K. Lee, *Nanoscale*, 2016, **8**, 16379.
- [9] Y. Kuang, Y. Zhang, Z. Cai, G. Feng, Y. Jiang, C. Jin, J. Luo and X. Sun, *Chem. Sci.*, 2015, **6**, 7122.
- [10] Y. Ye, J. Joo, S. Lee and J. Lee, *J. Mater. Chem. A*, 2014, **2**, 19239.
- [11] X. Wang, L. F.-Cosme, X. Yang, M. Luo, J. Liu, Z. Xie and Y. Xia, *Nano Lett.*, 2016, **16**, 1467.
- [12] X. Wang, S.-I. Choi, L. T. Roling, M. Luo, C. Ma, L. Zhang, M. Chi, J. Liu, Z. Xie, J. A. Herron, M. Mavrikakis and Y. Xia, *Nat. Commun.*, 2015, **6**:7594, DOI: 10.1038/ncomms8594.
- [13] X. Zhao, S. Chen, Z. Fang, J. Ding, W. Sang, Y. Wang, J. Zhao, Z. Peng and J. Zeng, *J. Am. Chem. Soc.*, 2015, **137**, 2804.
- [14] Y. Lim, S. K. Kim, S.-C. Lee, J. Choi, K. S. Nahm, S. J. Yoo and P. Kim, *Nanoscale*, 2014, **6**, 4038.
- [15] H. Li, R. Yao, D. Wang, J. He, M. Li and Y. Song, *J. Phys. Chem. C*, 2015, **119**, 4052.
- [16] L. Zhang, S. Yu, J. Zhang and J. Gong, *Chem. Sci.*, 2016, **7**, 3500.
- [17] C. V. Boone and G. Maia, *Electrochim. Acta*, 2017, **247**, 19.
- [18] L. B. Venarussio, J. Bettini and G. Maia, *ChemElectroChem*, 2016, **3**, 749.

- [19] L. B. Venarussio, J. Bettini and G. Maia, *J. Solid State Electrochem.*, 2016, **20**, 1753.
- [20] U. A. Paulus, T. J. Schmidt, H. A. Gasteiger and R. J. Behm, *J. Electroanal. Chem.*, 2001, **495**, 134–145.
- [21] A. J. Bard, L. R. Faulkner in *Electrochemical Methods: Fundamentals and Applications*, John Wiley & Sons, New York, 2001.
- [22] R. E. Davis, G. L. Horvath and C. W. Tobias, *Electrochim. Acta*, 1967, **12**, 287–297.
- [23] R. R. Adžić, J. Wang and B. M. Ocko, *Electrochim. Acta*, 1995, **40**, 83–89.
- [24] D. R. Lide in *CRC Handbook of Chemistry and Physics*, 82nd ed., CRC Press, Boca Raton, 2001.
